# Supplementary material for: Loss of the BCR-FGFR1 GEF Domain Suppresses RHOA Activation and Enhances B-Lymphomagenesis in Mice
Source: Oxford University Press journal article supplement (doi:10.1158/0008-5472.can-18-1889), 2018-11-09
Supplement: 00085472can181889-sup-203840_2_supp_5140157_phsglh.docx [file 00085472can181889-sup-203840_2_supp_5140157_phsglh.docx]

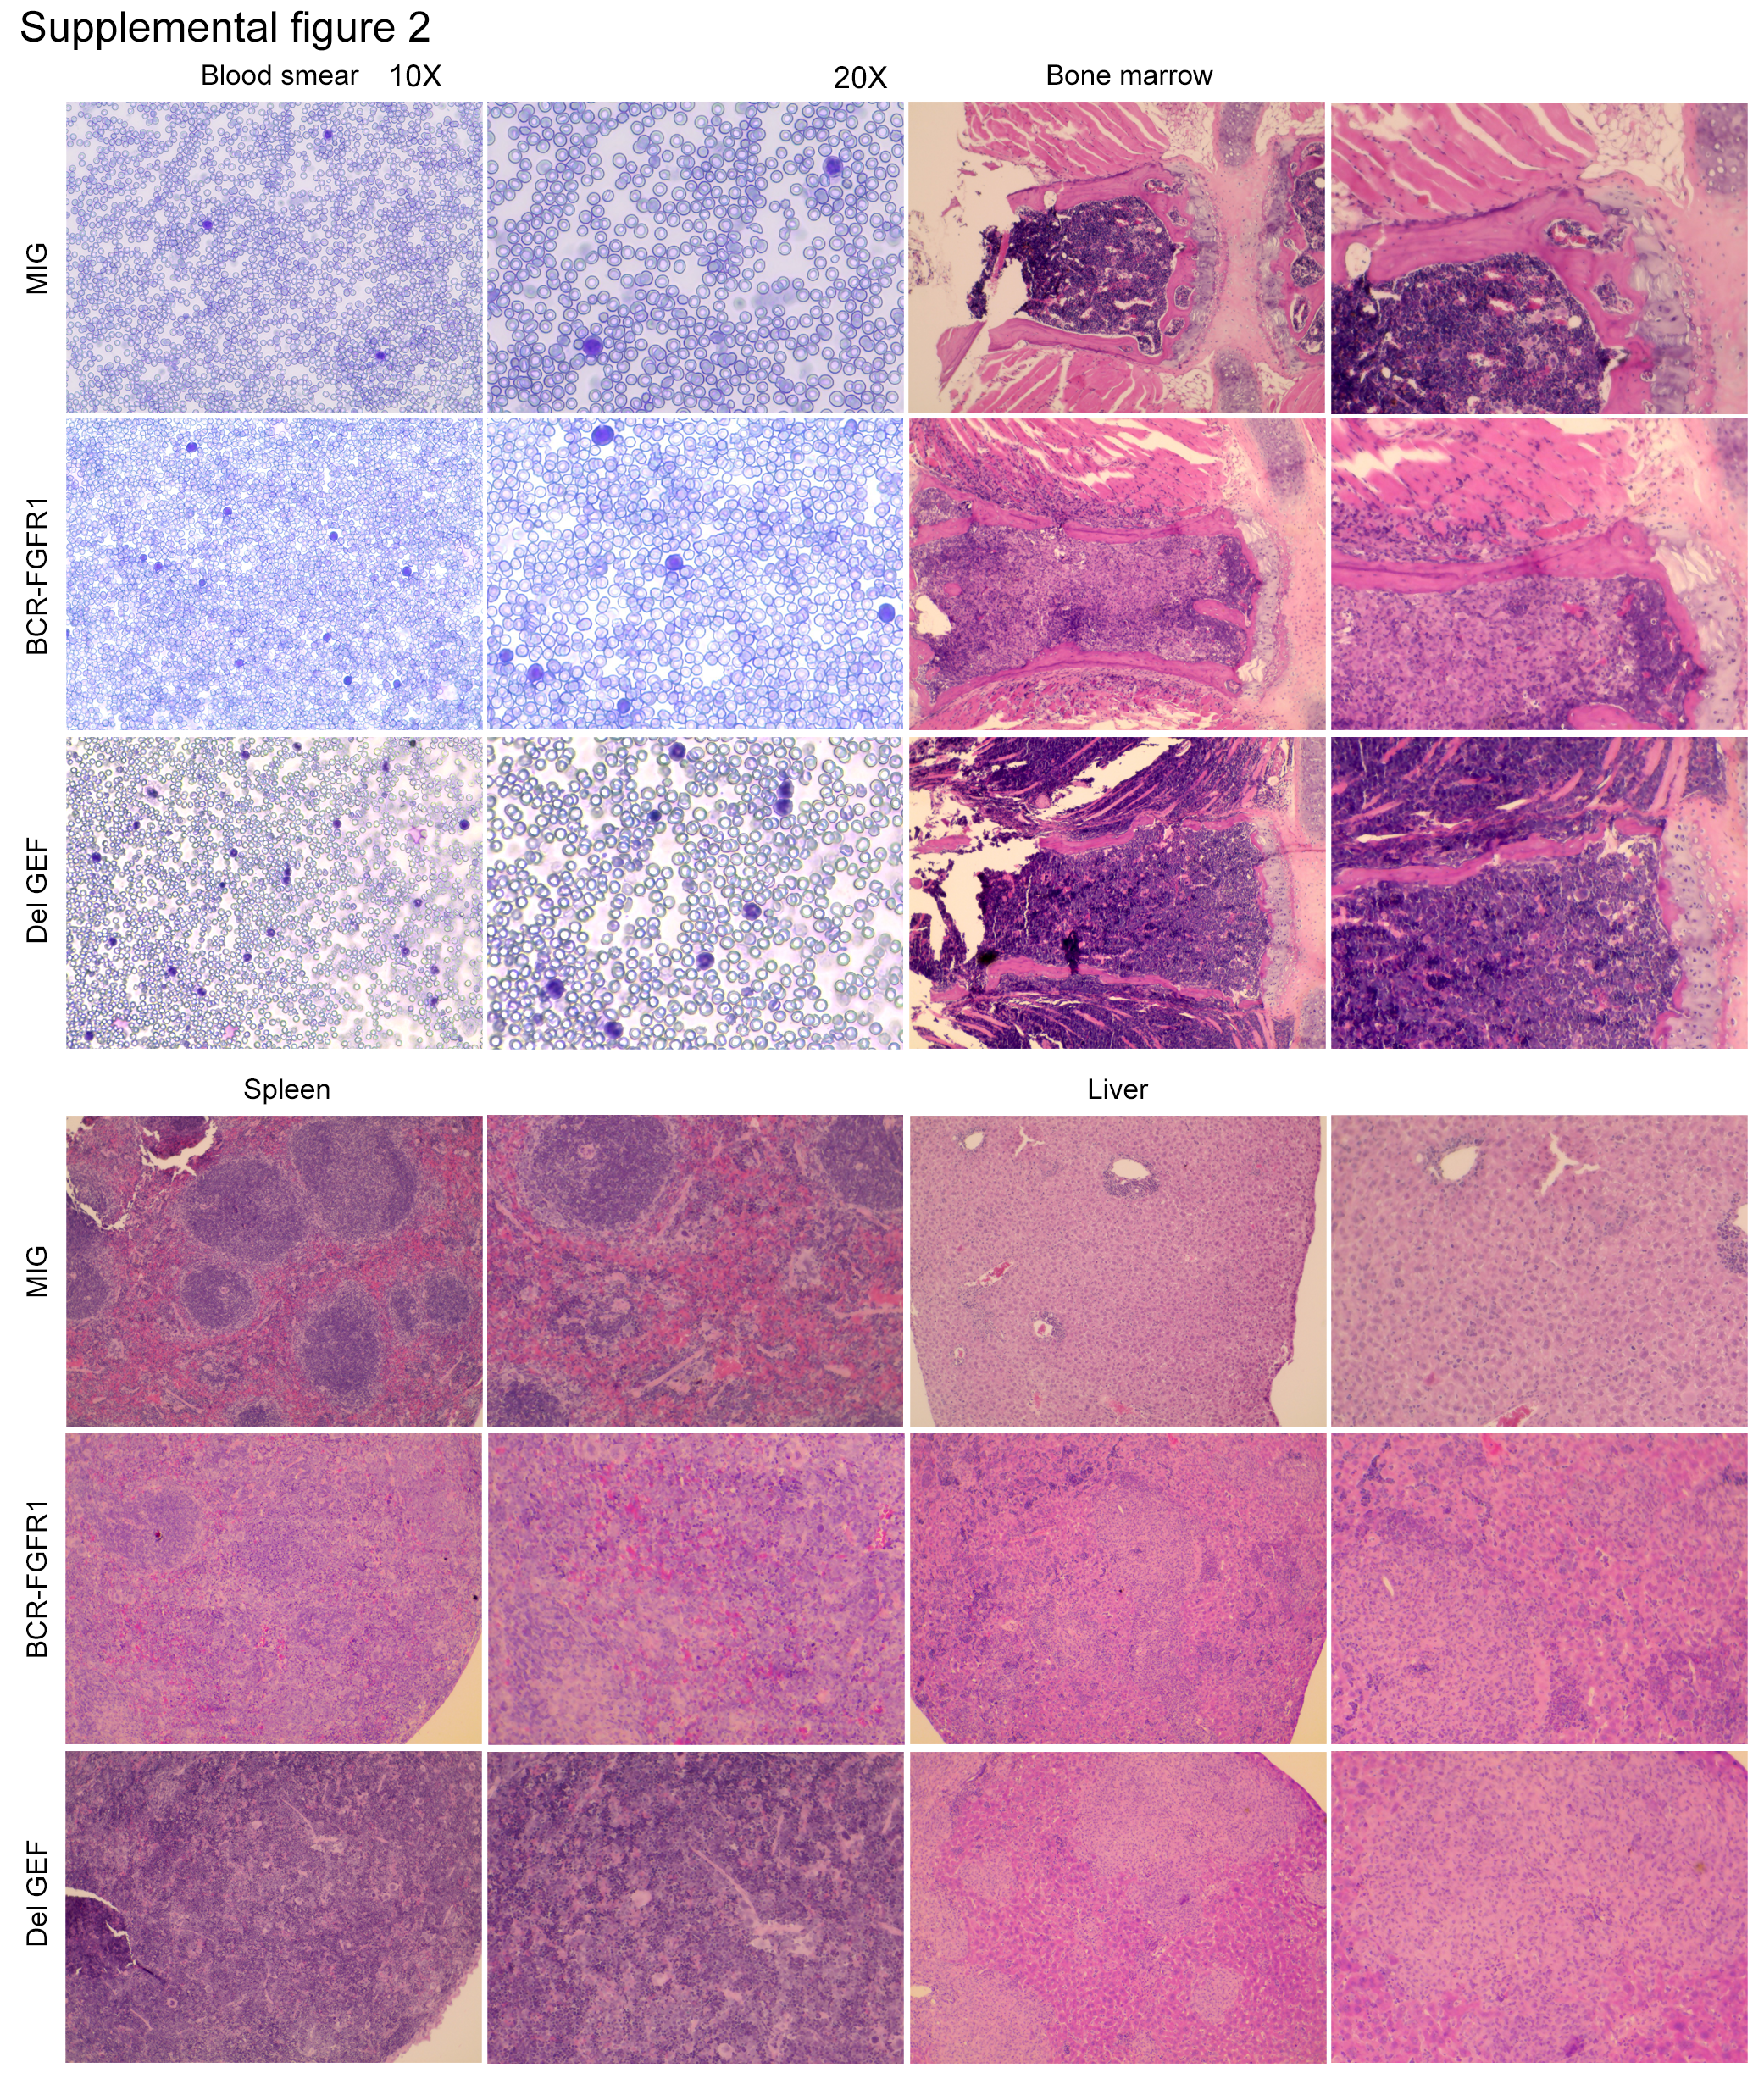


**Supplementary Figure S2**. Representative images of the peripheral blood, liver and spleen from mice transplanted with bone marrow transduced with either the empty vector (MIG), the full length BCR-FGFR1 chimeric kinase or the BCR-FGFR1 construct with deletion of the BCR GEF domain.

Morphologic examination of samples obtained from the control mice (MIG) revealed unremarkable findings. Specifically, the peripheral blood was without leukocytosis or circulating blasts. The bone marrow revealed appropriate progressive trilineage hematopoiesis with an appropriate interstitial lymphocytosis. The spleen revealed well demarcated white and red pulp with occasional scattered megakaryocytes, which is normal in mouse spleen. The liver revealed unremarkable hepatocytes without significant infiltration by hematopoietic cells.

Morphologic examination of samples obtained from the mice transplanted with BCR-FGFR1 transduced cells revealed findings consistent with a hematopoietic neoplasm with variable eosinophilia. Specifically, the peripheral blood revealed numerous blasts, which were enlarged in size, with increased nuclear-to-cytoplasmic ratio, open chromatin, and scant cytoplasm. The bone marrow revealed a cellular marrow with increased myeloid precursors, foci of increased blasts, and eosinophilia. The spleen revealed an infiltrate consisting of many cells with abundant pink cytoplasm and admixed eosinophils and neutrophils, but without large aggregates of blasts. The liver revealed an infiltration similar to the spleen.

Morphologic examination of samples obtained from mice transplanted with cells transduced with the GEF deletion revealed findings consistent with a more aggressive hematopoietic neoplasm with proliferative features and variable eosinophilia in blast phase. Specifically, the peripheral blood revealed leukocytosis with neutrophilia and few blasts. The bone marrow revealed replacement of the normal marrow space by abundant blasts with open chromatin and large cell size. These blasts showed brisk mitotic activity and infiltrated the surrounding tissue. The spleen and liver revealed an infiltration similar to the marrow with abundant blasts seen with brisk mitotic activity. Few scattered eosinophils were also appreciated.
