# Supplementary material for: Loss of the BCR-FGFR1 GEF Domain Suppresses RHOA Activation and Enhances B-Lymphomagenesis in Mice
Source: Oxford University Press journal article supplement (doi:10.1158/0008-5472.can-18-1889), 2018-11-09
Supplement: 00085472can181889-sup-203840_2_supp_5140159_phsgmh.doc [file 00085472can181889-sup-203840_2_supp_5140159_phsgmh.doc]

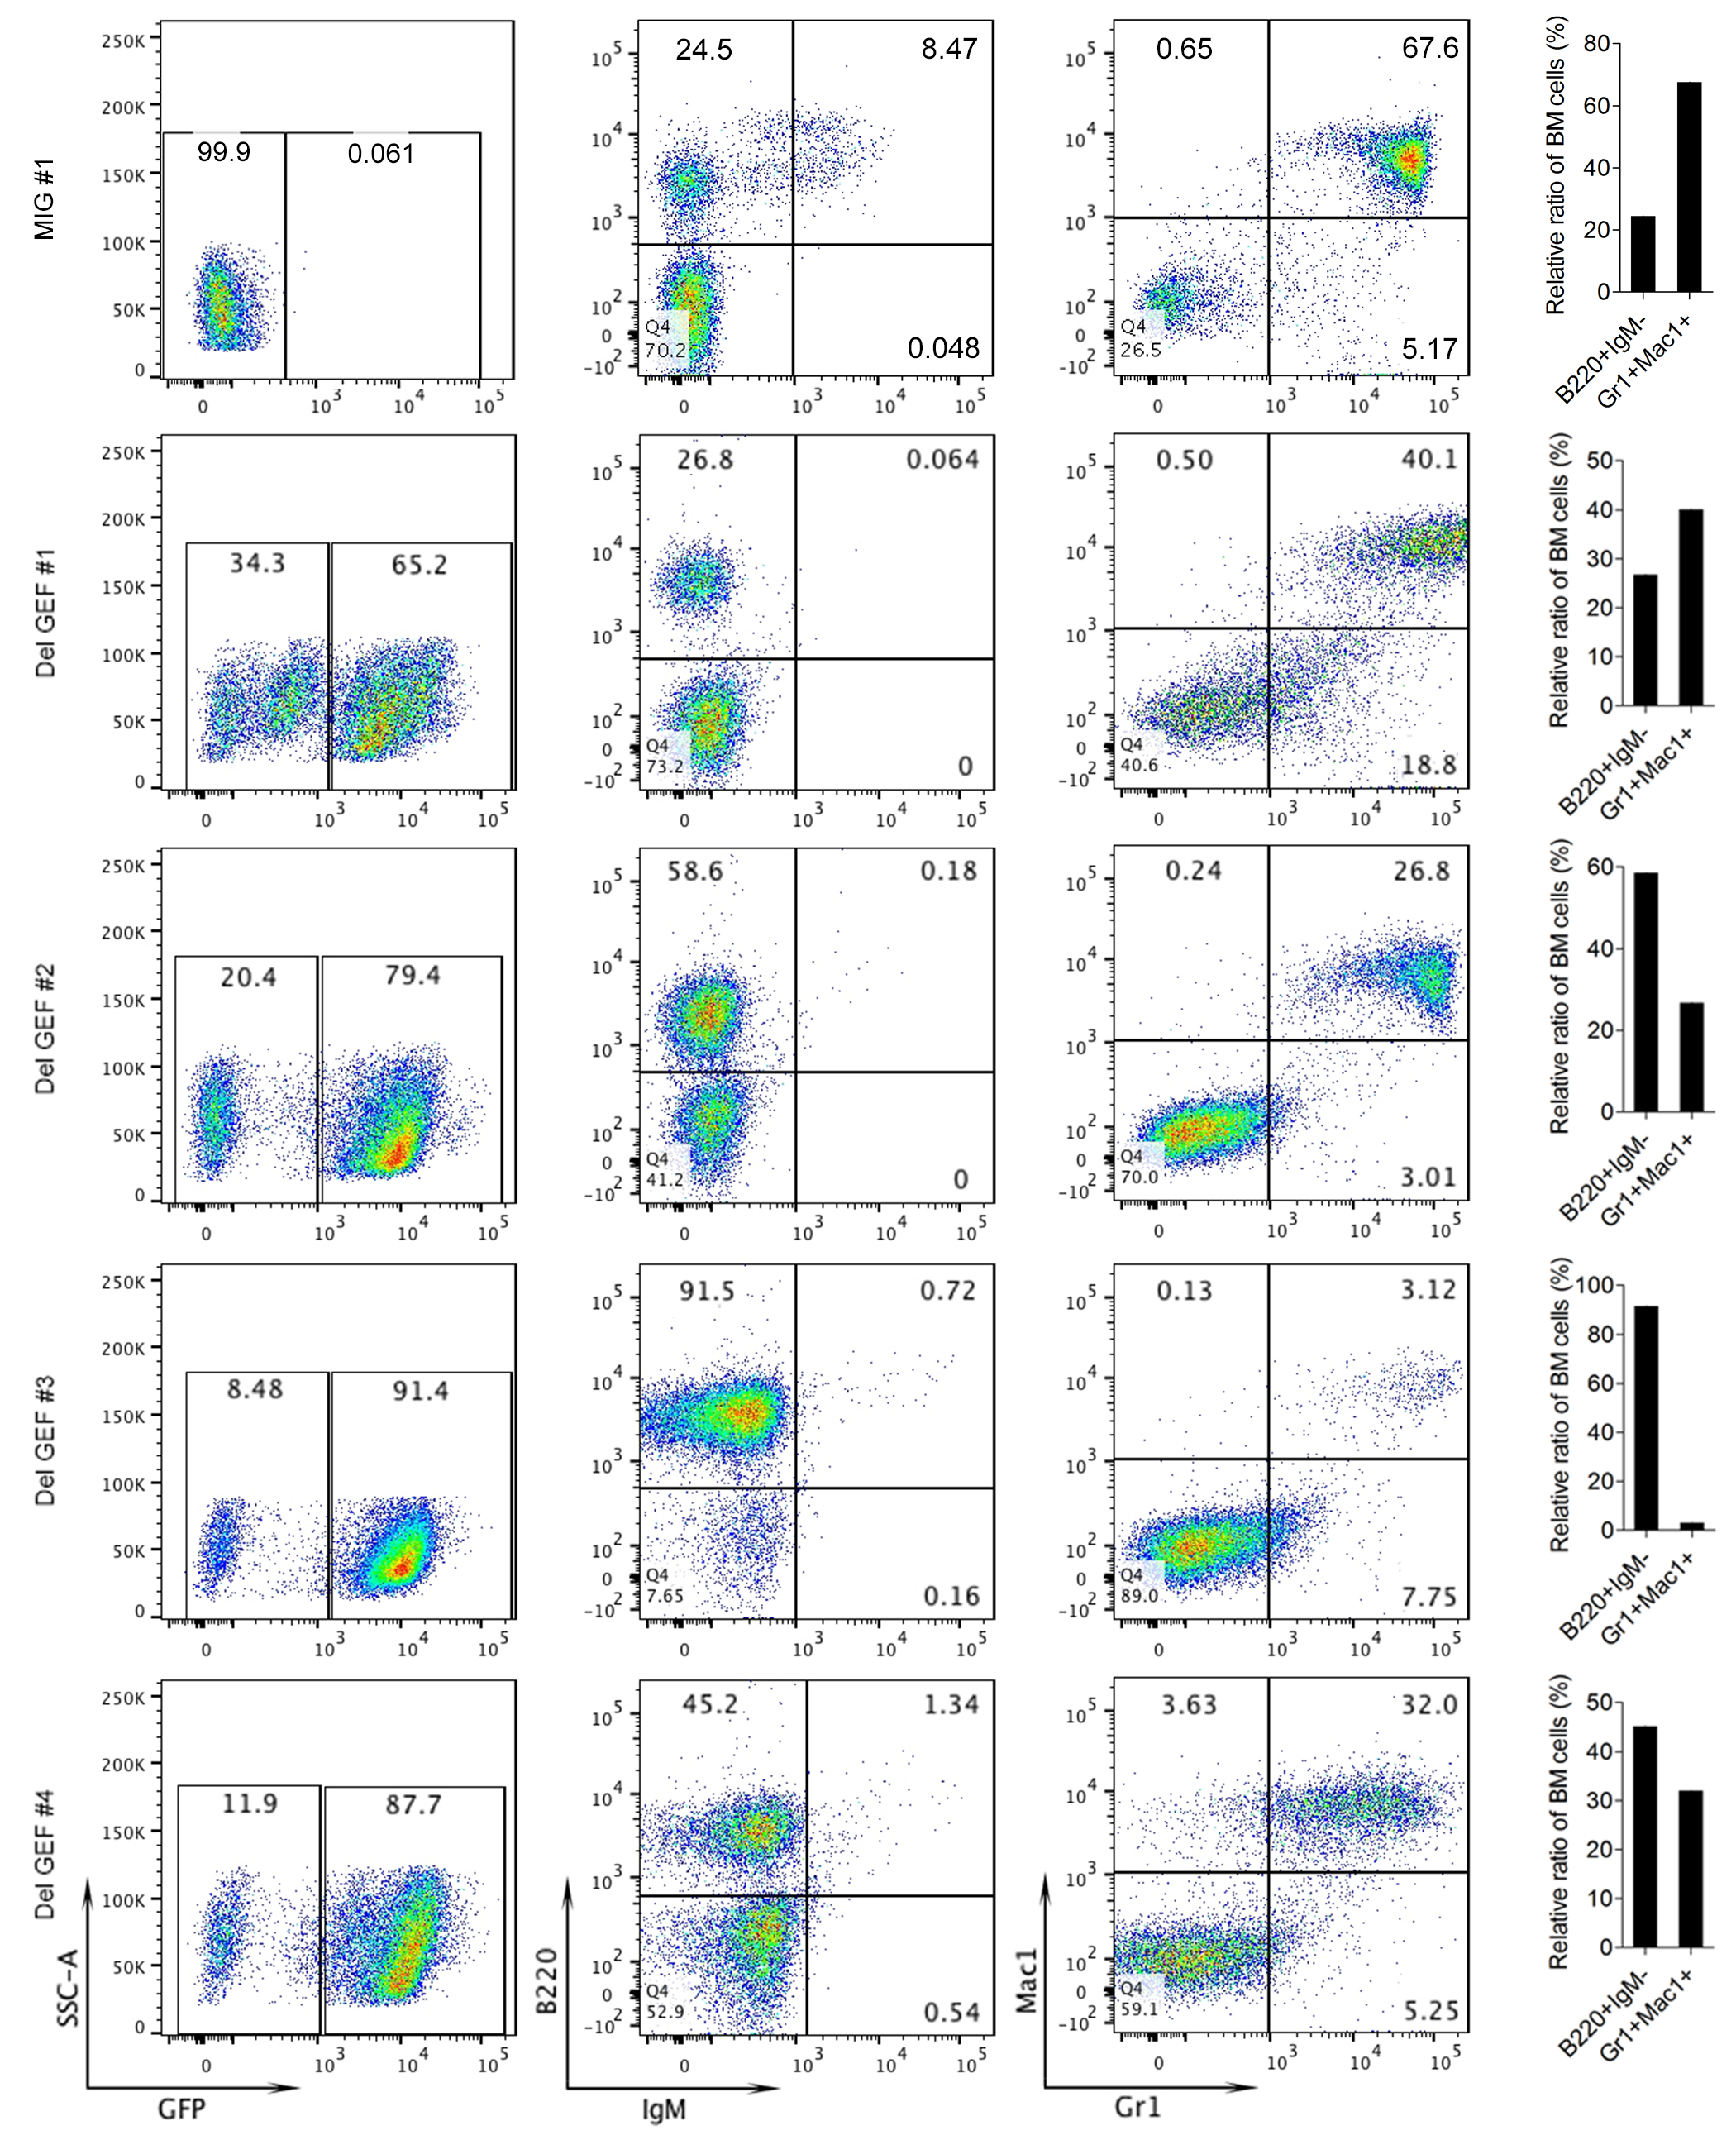


**Supplementary Figure S4**. Analysis of bone marrow cell immunophenotypes from three individual mice transplanted with cells expressing the GEF deletion construct compared with bone marrow cells expressing the empty vector (MIG) control. The MIG control cells show ~70% myeloid cells. All mice with deletion GEF expressing cells show a large proportion of B220+GFP+ cells. With the exception of mouse #3, reduced levels of Mac1+Gr1+ myeloid cells are seen. In mouse #3, however, as the population of B220+IgM- cells increases to 91.5%, the Mac1+Gr1+ population decreases to 3.12%, suggesting a progression towards a B-cell phenotype.
