# Supplementary material for: Loss of the BCR-FGFR1 GEF Domain Suppresses RHOA Activation and Enhances B-Lymphomagenesis in Mice
Source: Oxford University Press journal article supplement (doi:10.1158/0008-5472.can-18-1889), 2018-11-09
Supplement: 00085472can181889-sup-203840_2_supp_5140163_phkvws.doc [file 00085472can181889-sup-203840_2_supp_5140163_phkvws.doc]

**Supplementary Table 1.** Normalized RPPA data for BaF3 cells transformed with BCR-FGFR1 and Del GEF showing relative fold changes >1.2.

|  | **BCR-FGFR1** | **Del GEF** |
| --- | --- | --- |
|  |  |  |
| PAI-1 | 6.531085573 | 1 |
| GAPDH | 5.745528601 | 1 |
| S6_pS235_S236 | 2.106389471 | 1 |
| IRF-1 | 2.05604419 | 1 |
| p16INK4a | 2.044818268 | 1 |
| S6_pS240_S244 | 1.941417834 | 1 |
| HER3_pY1289 | 1.865187031 | 1 |
| Rock-1 | 1.689774648 | 1 |
| Chk1_pS296 | 1.448028979 | 1 |
| Cyclin-D3 | 1.372566523 | 1 |
| p21 | 1.33540767 | 1 |
| GATA3 | 1.327042752 | 1 |
| p27_pT198 | 1.259191343 | 1 |
| PTEN | 1.257395073 | 1 |
| HSP27 | 1.23810019 | 1 |
| Mcl-1 | 1.225079629 | 1 |
| Bax | 1.224859801 | 1 |
| RBM15 | 1.206234606 | 1 |
| Smad4 | 1.201673848 | 1 |
| Granzyme-B | 1 | 3.02555212 |
| Axl | 1 | 2.005752838 |
| Rb_pS807_S811 | 1 | 1.79110141 |
| Collagen-VI | 1 | 1.499526372 |
| CD29 | 1 | 1.480716662 |
| NAPSIN-A | 1 | 1.459795318 |
| Histone-H3 | 1 | 1.458855755 |
| PAR | 1 | 1.439451757 |
| YB1_pS102 | 1 | 1.413492683 |
| Snail | 1 | 1.407957178 |
| ARID1A | 1 | 1.378169356 |
| E-Cadherin | 1 | 1.342341119 |
| Cdc2_pY15 | 1 | 1.331581002 |
| Stat5a | 1 | 1.314407799 |
| Merlin | 1 | 1.298263584 |
| ADAR1 | 1 | 1.297305962 |
| Akt_pS473 | 1 | 1.294104986 |
| Pdcd4 | 1 | 1.287271968 |
| ATRX | 1 | 1.274844144 |
| CDK1 | 1 | 1.263449672 |
| p38_pT180_Y182 | 1 | 1.260258312 |
